# Supplementary material
Source: PubMed Central journal article supplement (PMC9521392)
Supplement: tp-106-2085-s001.pdf [file tp-106-2085-s001.pdf]

# SUPPLEMENTAL DIGITAL CONTENT

## Figure S1

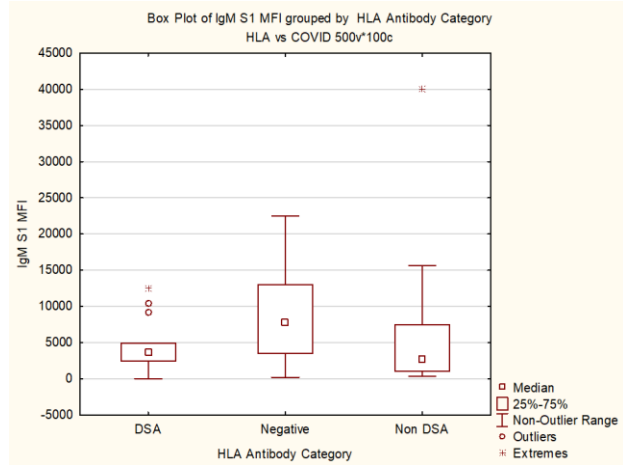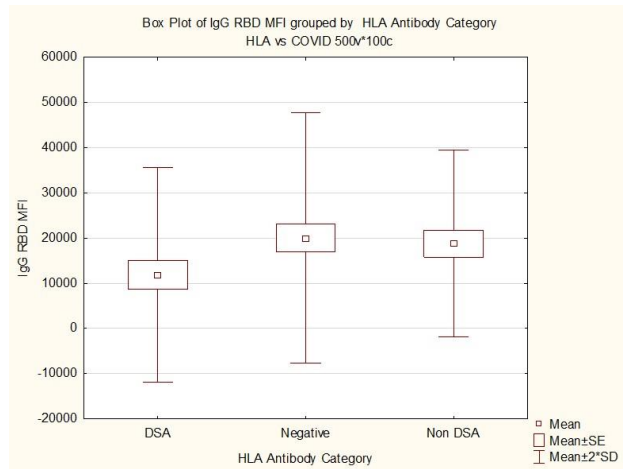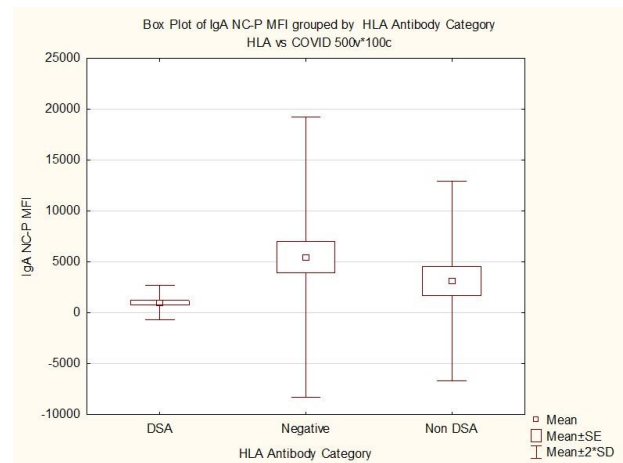

**FIGURE S1.** Anti-SARS-CoV-2 antibodies exhibited reduced strength (MFI) in patients with DSA versus patients without DSA or without anti-HLA antibody. SARS-CoV-2, severe acute respiratory syndrome coronavirus 2; S, trimeric spike protein; NCP, nucleocapsid protein; HLA, human leukocyte antigen; DSA, anti-HLA donor-specific antibody; MFI, mean fluorescence intensity; Ig = immunoglobulin.

**Figure S2**

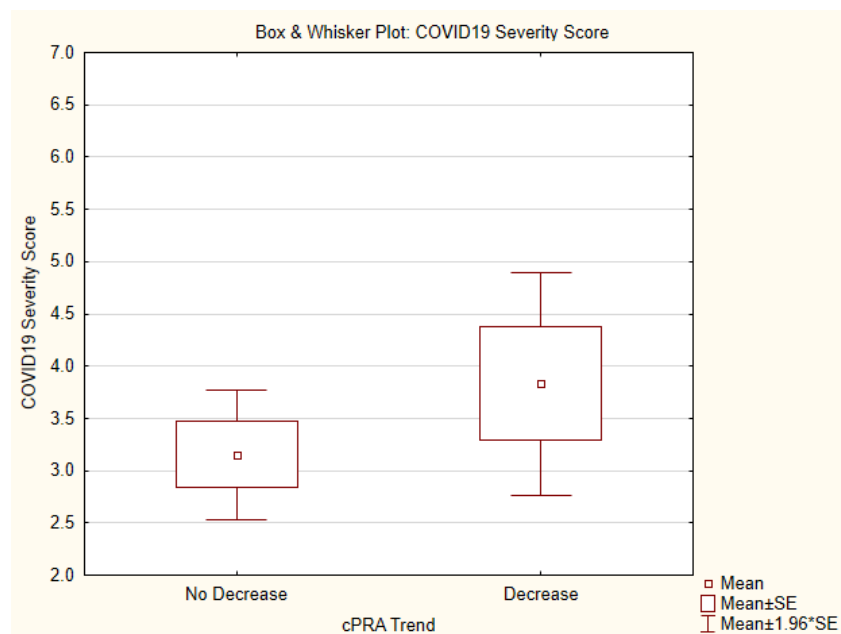

**FIGURE S2.** COVID-19 severity score in patients with no decrease in cPRA versus patients with decrease in cPRA. cPRA, calculated panel reactive antibody (%); . Peak clinical severity score: one, not hospitalized with resumption of normal activities; two, not hospitalized but unable to resume normal activities; three, hospitalized, not requiring supplemental oxygen; four, hospitalized, requiring supplemental oxygen; five, hospitalized, requiring nasal high-flow oxygen therapy, noninvasive mechanical ventilation, or both; six, hospitalized, requiring

extracorporeal membrane oxygenation, invasive mechanical ventilation, or both; and seven, death. IQR, interquartile range; N/A, not applicable.

**Figure S3**

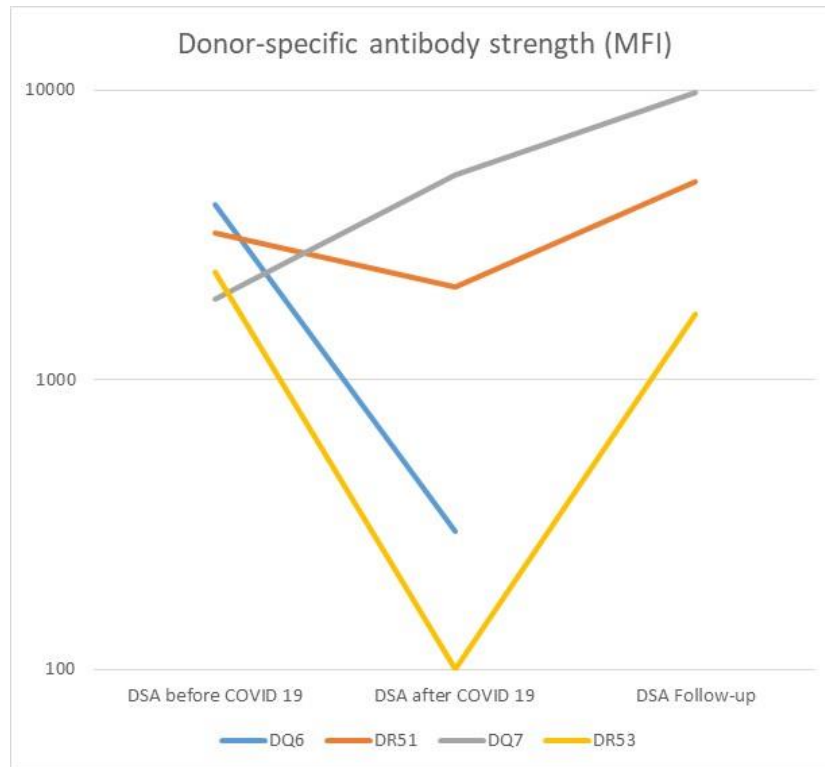

**FIGURE S3.** Anti-HLA donor-specific antibody strength before and after COVID-19 diagnosis. COVID-19, coronavirus disease 2019; MFI, mean fluorescence intensity.

**Table 1s Demographics of the study population with longitudinal data**

|                                                                                     | All patients<br>(n = 21) | DSA<br>(n = 8)       | HLA<br>antibodies,<br>no DSA (n =<br>7) | No HLA<br>antibodies<br>(n = 6) | P value for<br>differences<br>between<br>subgroups |
|-------------------------------------------------------------------------------------|--------------------------|----------------------|-----------------------------------------|---------------------------------|----------------------------------------------------|
| Age (IQR)                                                                           | 58 (44-67)               | 59.5 (49.5-<br>65.5) | 44 (41-65)                              | 65.5 (39-69)                    | 0.4 <sup>a</sup>                                   |
| Sex (% male)                                                                        | 57                       | 38                   | 71                                      | 67                              | 0.4 <sup>a</sup>                                   |
| Race/Ethnicity (%)                                                                  |                          |                      |                                         |                                 | 0.8 <sup>a</sup>                                   |
| Non-Hispanic<br>White                                                               | 10                       | 13                   | 0                                       | 17                              |                                                    |
| Non-Hispanic Black                                                                  | 24                       | 38                   | 29                                      | 0                               |                                                    |
| Hispanic                                                                            | 67                       | 50                   | 71                                      | 83                              |                                                    |
| Other                                                                               | 0                        | 0                    | 0                                       | 0                               |                                                    |
| Years since<br>transplant (IQR)                                                     | 3.6 (1.2-<br>6.9)        | 5.0 (1.5-8.1)        | 3.8 (1.4-5.3)                           | 1.8 (0.4-8.5)                   | 0.7 <sup>a</sup>                                   |
| Percent deceased<br>donor transplant                                                | 76                       | 63                   | 86                                      | 83                              | 0.5 <sup>a</sup>                                   |
| Percent with<br>History of rejection                                                | 0                        | 0                    | 0                                       | 0                               | NA                                                 |
| Mean Peak PRA<br>(SD)                                                               | 33 (36)                  | 47 (31)              | 46 (42)                                 | 0                               | 0.01 <sup>b</sup>                                  |
| Mean MMF dose<br>pre COVID-19 in<br>Mg (SD)                                         | 1380 (610)               | 1125 (641)           | 1714 (487)                              | 1333 (605)                      | 0.2 <sup>a</sup>                                   |
| Mean MMF dose<br>at time of first<br>sample draw in Mg<br>(SD)                      | 428 (597)                | 250 (534)            | 714 (698)                               | 333 (516)                       | 0.3 <sup>a</sup>                                   |
| Mean MMF dose<br>one month after<br>first sample drawn<br>in Mg (SD)                | 1119 (545)               | 1000 (756)           | 1214 (267)                              | 1166 (516)                      | 0.7 <sup>a</sup>                                   |
| MMF dose<br>decreased before<br>first COVID-19<br>antibody sample<br>drawn (%)      | 85                       | 71                   | 86                                      | 100                             | 0.4 <sup>a</sup>                                   |
| Steroid<br>administration<br>before first COVID-<br>19 antibody<br>sample drawn (%) | 100                      | 100                  | 100                                     | 100                             | NA                                                 |
| Mean HLA A,B,DR<br>mismatches <sup>1</sup>                                          | 5.1 (0.9)                | 4.1 (2.0)            | 4.4 (1.9)                               | 4.3 (1.2)                       | 0.4 <sup>a</sup>                                   |

|                                 |           |           |           |           |                  |
|---------------------------------|-----------|-----------|-----------|-----------|------------------|
| Mean DQ mismatches <sup>1</sup> | 1.1 (0.8) | 1.1 (0.7) | 0.9 (0.9) | 1.2 (1.0) | 0.7 <sup>a</sup> |
|---------------------------------|-----------|-----------|-----------|-----------|------------------|

DSA, donor specific antibodies; HLA, human leukocyte antigen; MMF, mycophenolate mofetil.

1: missing in 1 sample

a: p values >0.05 for 1) DSA compared with HLA antibodies, no DSA; 2) DSA compared with No HLA antibodies; and 3) HLA antibodies, no DSA compared with No HLA antibodies

b: p value =0.8 for DSA compared with HLA antibodies, no DSA; p value = 0.01 for DSA compared with No HLA antibodies, no DSA; and p value = 0.01 for HLA antibodies, no DSA compared with No HLA antibodies

**Table 2s Demographics of the study population without longitudinal data**

|                                                                                | All patients<br>(n = 25) | DSA<br>(n = 6) | HLA<br>antibodies, no<br>DSA (n = 5) | No HLA<br>antibodies<br>(n = 14) | P value for<br>differences<br>between<br>subgroups |
|--------------------------------------------------------------------------------|--------------------------|----------------|--------------------------------------|----------------------------------|----------------------------------------------------|
| Age (IQR)                                                                      | 51 (39-62)               | 50 (31-62)     | 39 (39-44)                           | 60.5 (47-66)                     | 0.09 <sup>a</sup>                                  |
| Sex (% male)                                                                   | 60                       | 67             | 80                                   | 50                               | 0.5 <sup>b</sup>                                   |
| Race/Ethnicity (%)                                                             |                          |                |                                      |                                  | 0.7 <sup>b</sup>                                   |
| Non-Hispanic White                                                             | 8                        | 0              | 0                                    | 14                               |                                                    |
| Non-Hispanic Black                                                             | 40                       | 33             | 60                                   | 36                               |                                                    |
| Hispanic                                                                       | 40                       | 50             | 20                                   | 43                               |                                                    |
| Other                                                                          | 12                       | 17             | 20                                   | 7                                |                                                    |
| Years since<br>transplant (IQR)                                                | 3.3 (0.9-8.9)            | 5.6 (0.1-11.7) | 0.9(0.9-6.9)                         | 3.7 (2.9-8.9)                    | 0.9 <sup>b</sup>                                   |
| Percent deceased<br>donor transplant <sup>1</sup>                              | 61                       | 67             | 60                                   | 58                               | 0.9 <sup>b</sup>                                   |
| Percent with<br>History of rejection                                           | 36                       | 17             | 40                                   | 43                               | 0.5 <sup>b</sup>                                   |
| Mean Peak PRA<br>(SD) <sup>2</sup>                                             | 13.5 (19)                | na             | 0                                    | 27*                              | 0.3 <sup>b</sup>                                   |
| Mean MMF dose<br>pre COVID-19 in Mg<br>(SD)                                    | 720 (693)                | 583 (801)      | 1000 (935)                           | 679 (575)                        | 0.7 <sup>b</sup>                                   |
| MMF dose<br>decreased before<br>first COVID-19<br>antibody sample<br>drawn (%) | 94                       | 100            | 100                                  | 90                               | 0.7 <sup>b</sup>                                   |

|                                                                        |           |            |           |           |                  |
|------------------------------------------------------------------------|-----------|------------|-----------|-----------|------------------|
| Steroid administration before first COVID-19 antibody sample drawn (%) | 84        | 100        | 80        | 79        | 0.5 <sup>b</sup> |
| Mean A,B,DR mismatches <sup>3</sup>                                    | 4.3 (1.8) | 4.75 (1.0) | 5 (0.8)   | 3.8 (2.3) | 0.8 <sup>b</sup> |
| Mean DQ mismatches <sup>4</sup>                                        | 1.3 (0.8) | 1.5 (0.6)  | 0.7 (1.2) | 1.4 (0.7) | 0.5 <sup>b</sup> |

DSA, donor specific antibodies; HLA, human leukocyte antigen; MMF, mycophenolate mofetil.

\* one patient had a pre-diagnosis PRA >0 but no detected HLA antibodies.

- 1: missing in 2 samples
- 2: missing in 23 samples
- 3: missing in 7 samples
- 4: missing in 10 samples

a: p value =0.6 for DSA compared with HLA antibodies, no DSA; p value = 0.2 for DSA compared with No HLA antibodies, no DSA; and p value = 0.03 for HLA antibodies, no DSA compared with No HLA antibodies

b: p values >0.05 for 1) DSA compared with HLA antibodies, no DSA; 2) DSA compared with No HLA antibodies; and 3) HLA antibodies, no DSA compared with No HLA antibodies
